# Supplementary material for: Conserving Marine Forests: Assessing the Effectiveness of a Marine Protected Area for Cystoseira sensu lato Populations in the Central Mediterranean Sea
Source: MDPI journal article supplement (doi:10.3390/plants13020162), 2024-01-06

# **Conserving marine forests: assessing the effectiveness of a Marine Protected Area for *Cystoseira sensu lato* populations in the central Mediterranean Sea**

Francesco Paolo Mancuso <sup>1,2\*</sup>, Gianluca Sarà <sup>1,2</sup>, Anna Maria Mannino A.M. <sup>2,3</sup>

<sup>1</sup>Department of Earth and Marine Sciences (DiSTeM), University of Palermo, viale delle Scienze Ed. 16, 90128 Palermo, Italy

<sup>2</sup>NBFC, National Biodiversity Future Center, Palermo 90133, Italy

<sup>3</sup>Department of Biological, Chemical and Pharmaceutical Sciences and Technologies, University of Palermo, 90123 Palermo, Italy

\*Correspondence: francesco.mancuso@unipa.it; Tel.: +39 091 23860844

**Supplementary materials**

**Table S1** - PERMANOVAs results of the structure and composition of the *Cystoseira s.l.* assemblage among the MPA's zones.

| Source of variation  | Structure |       |         |           | Composition |         |           |  |
|----------------------|-----------|-------|---------|-----------|-------------|---------|-----------|--|
|                      | df        | MS    | Model-F | R2        | MS          | Model-F | R2        |  |
| zone                 | 2         | 0.103 | 55.027  | 0.707 *** | 0.654       | 40.394  | 0.643 *** |  |
| site (zone)          | 3         | 0.020 | 10.706  | 0.206 *** | 0.173       | 10.711  | 0.256 *** |  |
| transect(site(zone)) | 6         | 0.002 | 1.237   | 0.048 ns  | 0.018       | 1.131   | 0.054 ns  |  |
| Residuals            | 6         | 0.002 |         | 0.039     | 0.016       |         | 0.048     |  |
| Total                | 17        |       |         | 1.000     |             |         | 1.000     |  |

*Note:*

Zone was fixed and orthogonal with two levels (zone A, zone B and zone C), site was random and nested in zone with two levels (1 and 2), while transect was random and nested in site and zone with 3 levels (1, 2 and 3). PERMANOVAs based on Bray–Curtis measure of square-root transformed abundances (structure) or Jaccard measure (species presence/absence data) of *Cystoseira s.l.* assemblage. P-values were calculated using 9.999 permutations. Signif. codes: \*\*\*  $p < 0.001$ , ns  $p > 0.05$

**Table S2** - PERMANOVAs results of the structure and composition of the *Cystoseira s.l.* assemblage among all areas investigated (MPA's zones and unprotected sites).

| Source of variation | Structure |       |         |           | Composition |       |         |           |
|---------------------|-----------|-------|---------|-----------|-------------|-------|---------|-----------|
|                     | df        | MS    | Model-F | R2        |             | MS    | Model-F | R2        |
| area                | 4         | 0.104 | 68.019  | 0.818 *** |             | 0.755 | 57.042  | 0.798 *** |
| site (area)         | 3         | 0.020 | 13.101  | 0.118 *** |             | 0.173 | 13.104  | 0.138 *** |

| Source of variation  | Structure |       |         |          | Composition |       |         |          |
|----------------------|-----------|-------|---------|----------|-------------|-------|---------|----------|
|                      | df        | MS    | Model-F | R2       |             | MS    | Model-F | R2       |
| transect(site(area)) | 8         | 0.003 | 1.640   | 0.039 ns |             | 0.017 | 1.285   | 0.036 ns |
| Residuals            | 8         | 0.002 |         | 0.024    |             | 0.013 |         | 0.028    |
| Total                | 23        |       |         | 1.000    |             |       |         | 1.000    |

Note:

Area was fixed and orthogonal with five levels (zone A, zone B, zone C, white and urban), site was random and nested in zone with one or two levels, while transect was random and nested in site and zone with 3 levels (1, 2 and 3). PERMANOVAs based on Bray–Curtis measure of square-root transformed abundances (structure) or Jaccard measure (species presence/absence data) of *Cystoseira s.l.* assemblage. P-values were calculated using 9.999 permutations. Signif. codes: \*\*\*  $p < 0.001$ , ns  $p > 0.05$

**Table S3** Average similarity of the *Cystoseira s.l.* assemblage between and within the different zones investigated.

| Structure     |            |                |        |        |        | Composition |            |                |        |        |        |
|---------------|------------|----------------|--------|--------|--------|-------------|------------|----------------|--------|--------|--------|
| Average       | Similarity | between/within | groups |        |        | Average     | Similarity | between/within | groups |        |        |
|               | Zone B     | Zone A         | white  | Zone C | urban  |             | Zone B     | Zone A         | white  | Zone C | urban  |
| <b>Zone B</b> | 84.961     |                |        |        |        | Zone B      | 87.387     |                |        |        |        |
| <b>Zone A</b> | 47.027     | 75.826         |        |        |        | Zone A      | 50.869     | 76.864         |        |        |        |
| <b>white</b>  | 51.166     | 50.167         | 84.876 |        |        | white       | 54.158     | 56.108         | 96.078 |        |        |
| <b>Zone C</b> | 69.174     | 57.129         | 63.98  | 76.031 |        | Zone C      | 80.524     | 58.397         | 67.48  | 86.007 |        |
| <b>urban</b>  | 20.577     | 29.601         | 34.561 | 28.46  | 87.241 | urban       | 34.668     | 44.507         | 45.116 | 36.129 | 92.593 |

**Figure S1** – Example of experimental design.

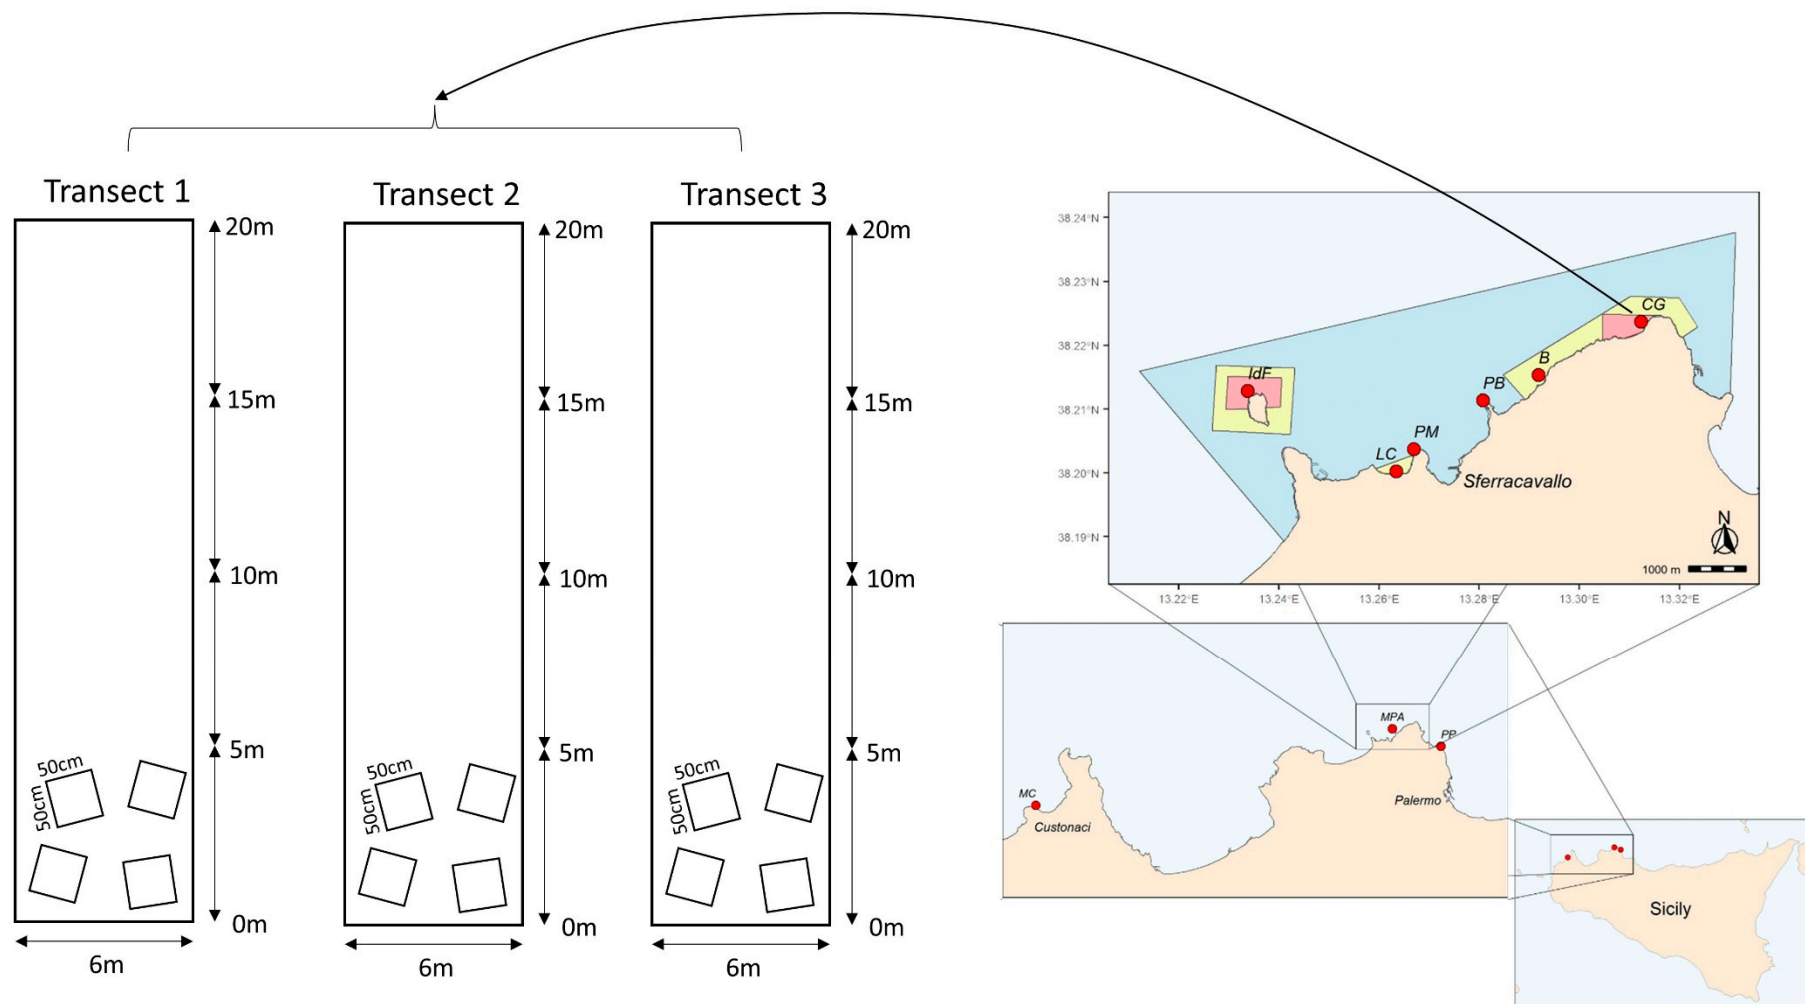

Supplement: s1 [file s1]
